# Supplementary material
Source: publisher site journal article supplement (https://www.dovepress.com/article/345780)
Supplement: Supplementary file 1 [file get_supplementary_file.php]

Antimicrobial activity of *Brassica rapa* L. flowers extract on gastrointestinal tract infections and antiulcer potential against indomethacin-induced gastric ulcer in rats supported by metabolomics profiling

**Table S1:** Sequences of the utilized primers in the immunomodulatory activity.

| **Gene** | **Primer sequence*** | **Reference** |
| --- | --- | --- |
| COX-2 | F 5′-TTCAAATGAGATTGTGGGAAAATTGCT-3′  R 5′-AGATCATCTCTGCCTGAGTATCTT-3′ | ([Ezzat, Hassan et al. 2021](#_ENREF_2)) |
| iNOS | F 5′-TCTTGGTCAAAGCTGTGCTC-3′  R 5′-CATTGCCAAACGTACTGGTC-3′ | ([Ezzat, Hassan et al. 2021](#_ENREF_2)) |
| IL-6 | F 5′-AAAGAGGCACTGGCAGAAAA-3′  R 5′-AGCTCTGGCTTGTTCCTCAC-3′ | ([Chase, Cone et al. 2016](#_ENREF_1)) |
| TNF-α | F 5'-ATGAGCACTGAAAGCATGATC-3'  R 5'-TCACAGGGCAATGATCCCAAAGTAGACCTGCCC-3' | ([Sandeep Varma, Ashok et al. 2011](#_ENREF_3)) |
| NF-κB | F 5′-GCGGGAGAGGGGATTCCCTGCGGCCCCG-3′  R 5′-CGGGGCCGCAGGGAATCCCCTCTCCCGC-3′ | ([Ezzat, Hassan et al. 2021](#_ENREF_2)) |
| GAPDH | F 5'-ACCACAGTCCATGCCATCAC-3'  R 5'-TCCACCACCCTGTTGCTGTA-3' | ([Sandeep Varma, Ashok et al. 2011](#_ENREF_3)) |

* F stands for forward and R stands for reverse.

**Table S2:** Sequences of the utilized primersinthe *in vivo* studies.

| **Gene** | **Forward primer** | **Reverse primer** | **Product length** | **Reference sequence** |
| --- | --- | --- | --- | --- |
| IL-10 | AGACCAAGGTGTCTACAAGGC | AGAGAGCTCTGTCTAGGTCCTG | 144 | NM_010548.2 |
| GPX | AGTCCACCGTGTATGCCTTC | CCTCAGAGAGACGCGACATT | 112 | NM_008160.6 |
| NF-KB | CCCTACGGAACTGGGCAAAT | GCGGAATCGAAATCCCCTCT | 153 | [NM_006501106.4](https://www.ncbi.nlm.nih.gov/entrez/viewer.fcgi?db=nucleotide&id=1907149239) |
| MPO | ATGCCCACCGAATGACAAGT | AGCCATTGCGATTGACTCCA | 167 | [NM _010824.2](https://www.ncbi.nlm.nih.gov/entrez/viewer.fcgi?db=nucleotide&id=226823249) |
| β-actin | TGGCTCCTAGCACCATGAAG | AACGCAGCTCAGTAACAGTCC | 193 | [NM _007393.5](https://www.ncbi.nlm.nih.gov/entrez/viewer.fcgi?db=nucleotide&id=930945786) |

|  | Table S3. MDA level within the control and the experimental groups | | | |  |
| --- | --- | --- | --- | --- | --- |
|  | **Study groups** | | | | **Test of significance** |
| **Control group (n=15)** | **Ulcer induced group (n=15)** | **Treatment group (BRFE)**  **(150 mg/kg)**  **(n=15)** | **Treatment group**  **(BRFE)**  **(300 mg/kg)**  **(n=15)** |
| MDA | 139.20 ± 9.8 | 311.60 ± 22.09 | 183.40 ± 17.34 | 154 ± 7.05 | F= 395.904  P <0.001** |
| P1 |  | < 0.001** | < 0.001** | 0.050* |
| P2 |  |  | < 0.001** | < 0.001** |
| P3 |  |  |  | < 0.001** |

SD: standard deviation, F for ANOVA test

* statistically significant if P ≤0.05

** highly statistically significant result if P ≤0.001

P1:comparison in relation to control group

P2: comparison in relation to ulcer induced group

P3: comparison in relation to treatment group (BRFE) (150 mg/kg)

**Table S4.** GSH level within the control and the experimental groups

|  | **Study groups** | | | | **Test of significance** |
| --- | --- | --- | --- | --- | --- |
| **Control group (n=15)** | **Ulcer induced group (n=15)** | **Treatment group (BRFE)**  **(150 mg/kg)**  **(n=15)** | **Treatment group (BRFE)**  **(300 mg/kg)**  **(n=15)** |
| GSH | 409.60 ± 30.63 | 157.20 ± 16.76 | 301.20 ± 22.06 | 379.20 ± 29 | F= 299.351  P <0.001** |
| P1 |  | < 0.001** | < 0.001** | 0.009* |
| P2 |  |  | < 0.001** | < 0.001** |
| P3 |  |  |  | < 0.001** |

SD: standard deviation, F for ANOVA test

* statistically significant if P ≤0.05

** highly statistically significant result if P ≤0.001

P1:comparison in relation to control group

P2: comparison in relation to ulcer induced group

P3: comparison in relation to treatment group (BRFE) (150 mg/kg)

**Table S5.** PGE2 level within the control and the experimental groups

|  | **Study groups** | | | | **Test of significance** |
| --- | --- | --- | --- | --- | --- |
| **Control group (n=15)** | **Ulcer induced group (n=15)** | **Treatment group (BRFE)**  **(150 mg/kg)**  **(n=15)** | **Treatment group (BRFE)**  **(300 mg/kg)**  **(n=15)** |
| PGE2 | 43.80 ±3.67 | 24 ± 2.07 | 40 ± 1.46 | 43 ± 0.65 | F= 254.284  P <0.001** |
| P1 |  | < 0.001** | < 0.001** | 0.766 |
| P2 |  |  | < 0.001** | < 0.001** |
| P3 |  |  |  | 0.003* |

SD: standard deviation, F for ANOVA test

* statistically significant if P ≤0.05

** highly statistically significant result if P ≤0.001

P1:comparison in relation to control group

P2: comparison in relation to ulcer induced group

P3: comparison in relation to treatment group (BRFE) (150 mg/kg)

**Table S6****.** Nitric oxide level within the control and the experimental groups

|  | **Study groups** | | | | **Test of significance** |
| --- | --- | --- | --- | --- | --- |
| **Control group (n=15)** | **Ulcer induced group (n=15)** | **Treatment group (BRFE)**  **(150 mg/kg)**  **(n=15)** | **Treatment group (BRFE)**  **(300 mg/kg)**  **(n=15)** |
| NO | 821.80 ± 14.73 | 345.40 ± 7.68 | 795.80 ± 9.31 | 811 ± 11.45 | F= 556.248  P <0.001** |
| P1 |  | < 0.001** | < 0.001** | 0.048* |
| P2 |  |  | < 0.001** | < 0.001** |
| P3 |  |  |  | 0.002* |

SD: standard deviation, F for ANOVA test

* statistically significant if P ≤0.05

** highly statistically significant result if P ≤0.001

P1:comparison in relation to control group

P2: comparison in relation to ulcer induced group

P3: comparison in relation to treatment group (BRFE) (150 mg/kg)

**Table S7.** IL-10 gene expression within the control and the experimental groups

|  | **Study groups** | | | | **Test of significance** |
| --- | --- | --- | --- | --- | --- |
| **Control group (n=15)** | **Ulcer induced group (n=15)** | **Treatment group (BRFE)**  **(150 mg/kg)**  **(n=15)** | **Treatment group (BRFE)**  **(300 mg/kg)**  **(n=15)** |
| IL-10 gene expression | 1.25± 0.36 | 0.75 ± 0.18 | 0.96 ± 0.21 | 1.06 ± 0.27 | F= 218.64  P <0.001** |
| P1 |  | < 0.001** | 0.004* | 0.025* |
| P2 |  |  | < 0.001** | < 0.001** |
| P3 |  |  |  | 0.047* |

SD: standard deviation, F for ANOVA test

* statistically significant if P ≤0.05

** highly statistically significant result if P ≤0.001

P1:comparison in relation to control group

P2: comparison in relation to ulcer induced group

P3: comparison in relation to treatment group (BRFE) (150 mg/kg)

**Table S8.** GPX level within the control and the experimental groups

|  | **Study groups** | | | | **Test of significance** |
| --- | --- | --- | --- | --- | --- |
| **Control group (n=15)** | **Ulcer induced group (n=15)** | **Treatment group (BRFE)**  **(150 mg/kg)**  **(n=15)** | **Treatment group (BRFE)**  **(300 mg/kg)**  **(n=15)** |
| GPX | 1.34 ± 0.39 | 0.75 ± 0.19 | 1.02 ± 0.22 | 1.2 ± 0.13 | F= 266.29  P <0.001** |
| P1 |  | < 0.001** | 0.005* | 0.031* |
| P2 |  |  | < 0.001** | < 0.001** |
| P3 |  |  |  | 0.042* |

SD: standard deviation, F for ANOVA test

* statistically significant if P ≤0.05

** highly statistically significant result if P ≤0.001

P1:comparison in relation to control group

P2: comparison in relation to ulcer induced group

P3: comparison in relation to treatment group (BRFE) (150 mg/kg)

**Table S9.** NF-KB level within the control and the experimental groups

|  | **Study groups** | | | | **Test of significance** |
| --- | --- | --- | --- | --- | --- |
| **Control group (n=15)** | **Ulcer induced group (n=15)** | **Treatment group (BRFE)**  **(150 mg/kg)**  **(n=15)** | **Treatment group (BRFE)**  **(300 mg/kg)**  **(n=15)** |
| NF-KB | 0.81 ± 0.08 | 1.75 ± 0.33 | 1.10 ± 0.25 | 0.83 ± 0.10 | F= 62.995  P <0.001** |
| P1 |  | < 0.001** | 0.003* | 0.990 |
| P2 |  |  | < 0.001** | < 0.001** |
| P3 |  |  |  | 0.007 * |

SD: standard deviation, F for ANOVA test

* statistically significant if P ≤0.05

** highly statistically significant result if P ≤0.001

P1:comparison in relation to control group

P2: comparison in relation to ulcer induced group

P3: comparison in relation to treatment group (BRFE) (150 mg/kg)

**Table S10****.** MPO activity within the control and the experimental groups

|  | **Study groups** | | | | **Test of significance** |
| --- | --- | --- | --- | --- | --- |
| **Control group (n=15)** | **Ulcer induced group (n=15)** | **Treatment group (BRFE)**  **(150 mg/kg)**  **(n=15)** | **Treatment group (BRFE)**  **(300 mg/kg)**  **(n=15)** |
| MPO | 0.81 ± 0.07 | 1.86 ± 0.11 | 1.07 ± 0.25 | 0.83 ± 0.10 | F= 162.292  P <0.001** |
| P1 |  | < 0.001** | < 0.001** | 0.978 |
| P2 |  |  | < 0.001** | < 0.001** |
| P3 |  |  |  | < 0.001** |

SD: standard deviation, F for ANOVA test

** highly statistically significant result if P ≤0.001

P1:comparison in relation to control group

P2: comparison in relation to ulcer induced group

P3: comparison in relation to treatment group (BRFE) (150 mg/kg)

|  | **Study groups** | | | | **Test of significance** |
| --- | --- | --- | --- | --- | --- |
| **Control group (n=15)** | **Ulcer induced group (n=15)** | **Treatment group (BRFE)**  **(150 mg/kg)**  **(n=15)** | **Treatment group (BRFE)**  **(300 mg/kg)**  **(n=15)** |
| B-actin | 0.81 ± 0.06 | 1.88 ± 0.11 | 1.07 ± 0.25 | 0.84 ± 0.10 | F= 173.956  P <0.001** |
| P1 |  | < 0.001** | < 0.001** | 0.944 |
| P2 |  |  | < 0.001** | < 0.001** |
| P3 |  |  |  | < 0.001** |

**Table S11.** B-actin level within the control and the experimental groups

SD: standard deviation, F for ANOVA test

** highly statistically significant result if P ≤0.001

P1:comparison in relation to control group

P2: comparison in relation to ulcer induced group

P3: comparison in relation to treatment group (BRFE) (150 mg/kg)

Reference

- Chase, K. A., J. J. Cone, C. Rosen and R. P. Sharma (2016). "The value of interleukin 6 as a peripheral diagnostic marker in schizophrenia." BMC psychiatry **16**(1): 1-7.
- Ezzat, M. I., M. Hassan, M. A. Abdelhalim, A. M. El-Desoky, S. O. Mohamed and S. M. Ezzat (2021). "Immunomodulatory effect of Noni fruit and its isolates: insights into cell-mediated immune response and inhibition of LPS-induced THP-1 macrophage inflammation." Food & Function **12**(7): 3170-3179.
- Sandeep Varma, R., G. Ashok, S. Vidyashankar, K. Nandakumar and P. Patki (2011). "Bresol inhibits phosphodiesterase 4 gene expression and modulates the levels of select mediators of inflammation in human monocytic cells." Journal of immunotoxicology **8**(4): 315-323.
